# Supplementary figures and images for: Ebola Virus Nucleocapsid-Like Structures Utilize Arp2/3 Signaling for Intracellular Long-Distance Transport
Source: MDPI journal article supplement (doi:10.3390/cells9071728), 2020-07-19

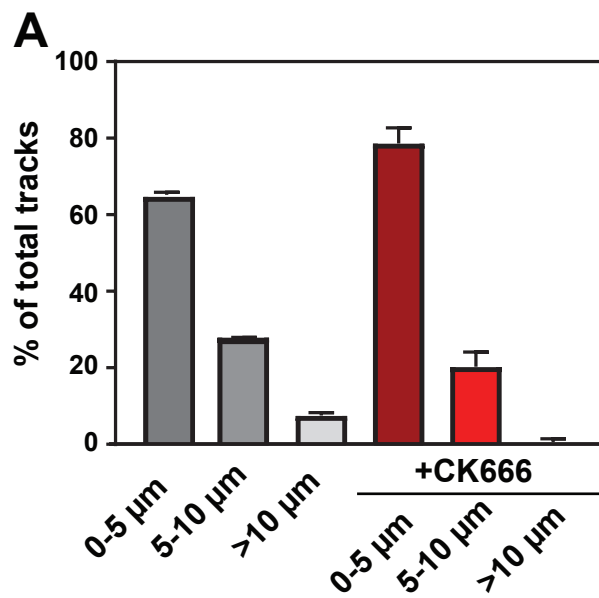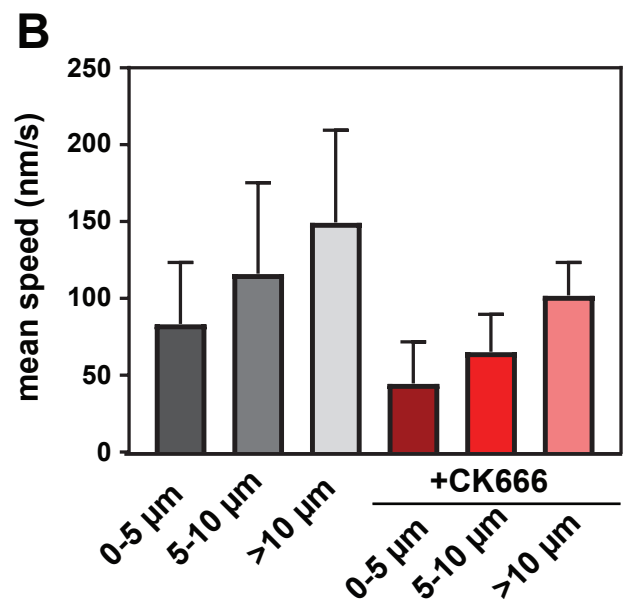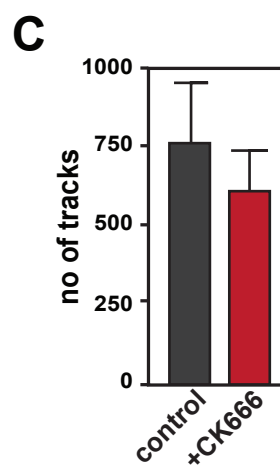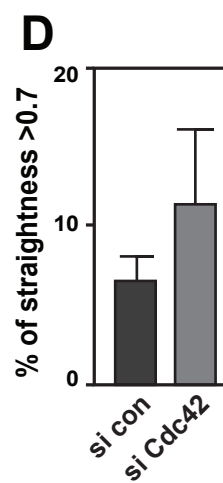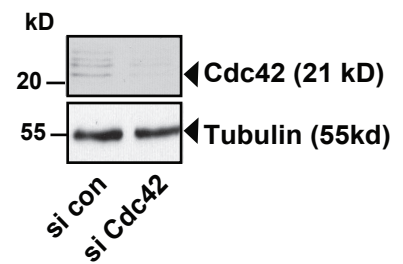

Supplement: s1 [file s1]
